# Supplementary material for: RORα controls hepatic lipid homeostasis via negative regulation of PPARγ transcriptional network
Source: PubMed Central journal article supplement (PMC5534431; doi:10.1038/s41467-017-00215-1), 2017-07-31
Supplement: 41467_2017_215_MOESM1_ESM.pdf [file 41467_2017_215_MOESM1_ESM.pdf]

File name: Supplementary Information

Description: Supplementary figures.

File name: Supplementary Data 1

Description: related to Figure 3a. Summary of the alignment results for mRNA-sequencing data. Among the raw reads generated from Illumina HiSeq-2500, the reads after trimming low quality and adapter sequences were used for the alignment. On average, each 98.5% of the reads (Mapped reads and Mapping rate) were aligned to a reference mouse genome (GRCm38). Of the mapped reads, 92.1% (Unique mapping rate) of the mapped reads were aligned to unique location (Uniquely mapped reads) in the genome. Exon Coverage denotes the fold of coverage of the mapped reads for the annotated exon region.

File name: Supplementary Data 2

Description: related to Figure 3a. List of genes affected by depletion of ROR $\alpha$ . Up- and down-regulation of the genes affected by ROR $\alpha$  depletion in the following three comparisons are shown together with their log<sub>2</sub>-fold-changes and P-values: 1) CD-fed ROR $\alpha$ <sup>LKO</sup> versus CD-fed ROR $\alpha$ <sup>f/f</sup> (KO/WT<sub>CD</sub>), 2) HFD-fed ROR $\alpha$ <sup>LKO</sup> versus HFD-fed ROR $\alpha$ <sup>f/f</sup> (KO/WT<sub>HFD</sub>), and 3) their log<sub>2</sub>-fold-change differences ((KO/WT<sub>HFD</sub>)/(KO/WT<sub>CD</sub>)). For each gene, its group number (Group) derived from the three comparisons is also included.

File name: Supplementary Data 3

Description: related to Figure 3b. GOBPs and KEGG pathways represented by the genes in Groups 1-4. The GOBPs and KEGG pathways represented by the genes in Groups 1-8 are shown. For each GOBP or KEGG pathway term, the count of the genes involved in the term and the enrichment P-values for the term are shown. The GOBPs and KEGG pathways with P-value < 0.05 and Count > 2 were selected as representative ones.

File name: Supplementary Data 4

Description: related to Figure 3c. Key transcription factors significantly regulating the genes in Group 1. TFs significantly enriched by the genes in Group 1 (P-value < 0.01) are shown. For each TF, the number of genes and the list of genes targeted by the TF are also provided.

File name: Supplementary Data 5

Description: Primer list for qRT-PCR and ChIP analysis.

File name: Peer review file

Description:

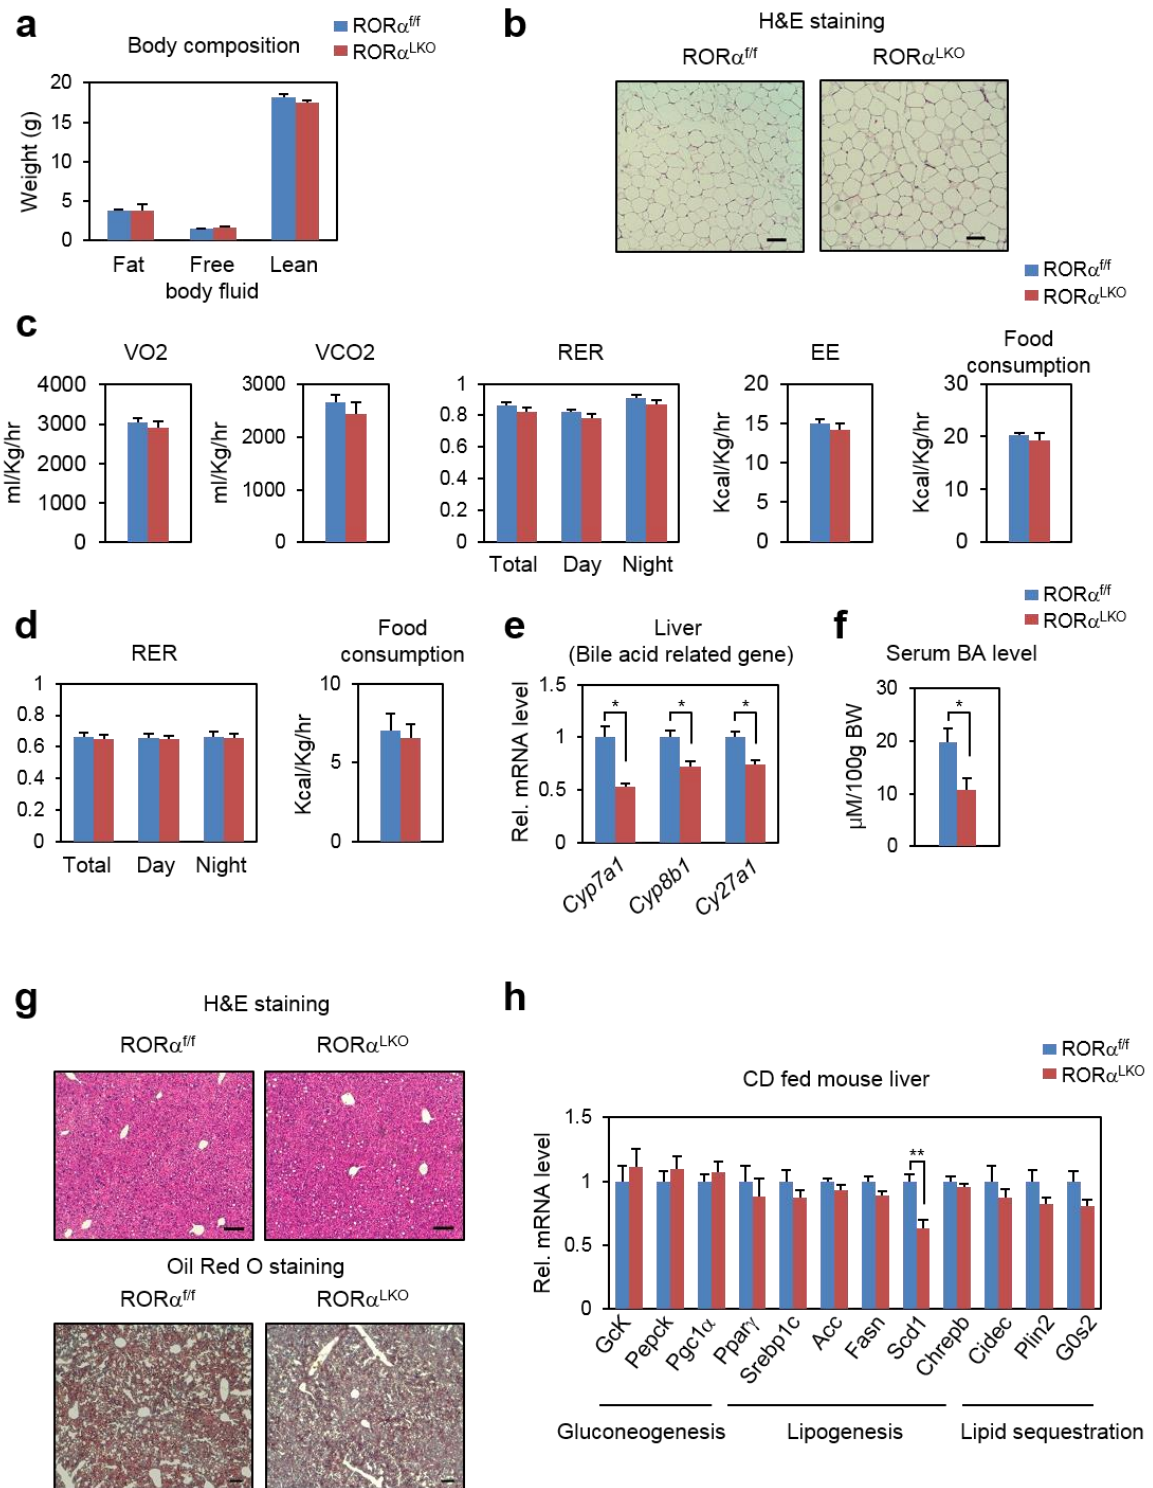

**Supplementary Figure 1. Characterization of ROR $\alpha^{f/f}$  and ROR $\alpha^{LKO}$  mice fed CD and HFD**

(a) Body composition analysis of ROR $\alpha^{f/f}$  and ROR $\alpha^{LKO}$  mice fed CD for 10 weeks (n=6/group). (b) Representative image of eWAT from ROR $\alpha^{f/f}$  and ROR $\alpha^{LKO}$  mice fed CD for 10 weeks stained with hematoxylin and eosin. Scale bar, 100  $\mu$ m. (c) Metabolic cage studies were performed in ROR $\alpha^{f/f}$  and ROR $\alpha^{LKO}$  mice fed CD for 10 weeks (n=6 mice/group). O<sub>2</sub> consumption (VO<sub>2</sub>), CO<sub>2</sub> production (VCO<sub>2</sub>), respiratory exchange ratio (RER), energy expenditure (EE) and food consumption were represented (left to right, in order). (d) Metabolic cage studies were performed in ROR $\alpha^{f/f}$  and ROR $\alpha^{LKO}$  mice fed HFD for 10 weeks (n=5-6 mice/group). Respiratory exchange ratio (RER) and food consumption were represented (left to right, in order). (e) Expression levels of bile acid related genes in liver extract from ROR $\alpha^{f/f}$  and ROR $\alpha^{LKO}$  mice fed HFD for 10 weeks (n=7/group) as determined by qRT-PCR. Expression was normalized to 36B4 expression. (f) Bile acid level of serums that were collected from ROR $\alpha^{f/f}$  and ROR $\alpha^{LKO}$  mice fed HFD for 10 weeks (n=6/group). BW, body weight. Data expressed as mean  $\pm$  SEM. Statistical analysis was performed using Student's unpaired t-test. \*p<0.05. (g) Representative liver histological section images of ROR $\alpha^{f/f}$  and ROR $\alpha^{LKO}$  mice fed CD for 10 weeks stained with hematoxylin and eosin (upper panel) and Oil Red O (bottom panel). Scale bar, 100  $\mu$ m. (h) Hepatic gene expression profile involved in metabolism from the livers of ROR $\alpha^{f/f}$  and ROR $\alpha^{LKO}$  mice (n=5/group) fed CD for 10 weeks as determined by qRT-PCR. Expression was normalized to 36B4 expression. Data expressed as mean  $\pm$  SEM. Statistical analysis was performed using Student's unpaired t-test. \*\*p<0.01.

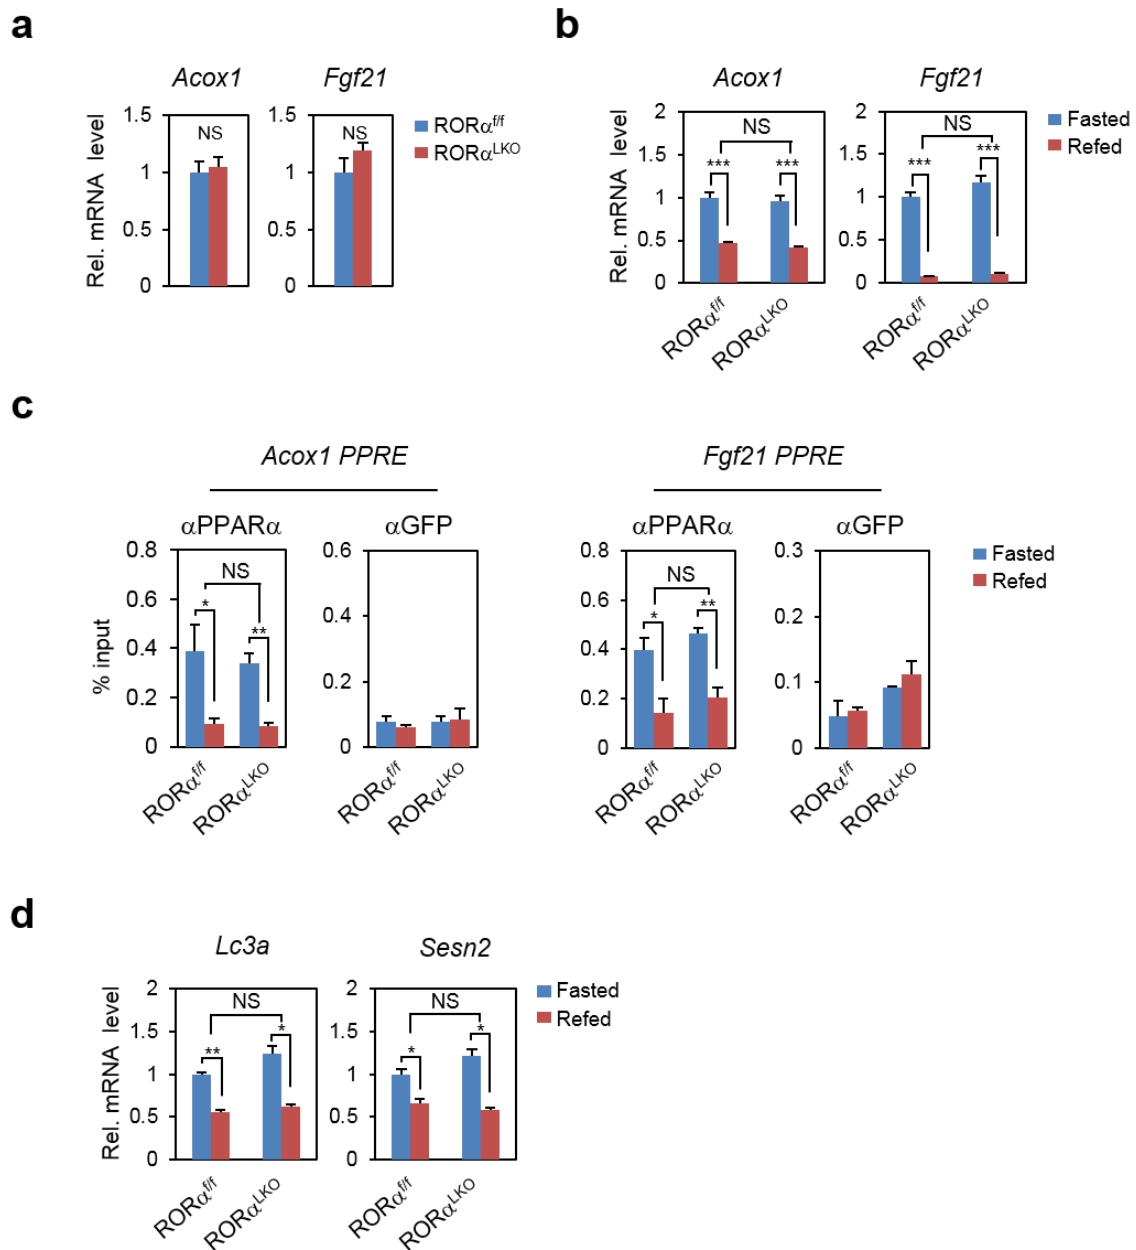

**Supplementary Figure 2. PPAR $\alpha$  and ROR $\alpha$  do not affect their roles in the mice liver with each other**

(a) Expression levels of PPAR $\alpha$  target genes in liver from ROR $\alpha^{f/f}$  and ROR $\alpha^{LKO}$  mice fed CD or HFD for 10 weeks (n=7-9/group) as determined by qRT-PCR. Expression was normalized to 36B4 expression. Data expressed as mean  $\pm$  SEM. Statistical analysis was

performed using Student's unpaired t-test. NS=Non-Significant. **(b-d)** 24 h fasted and 24 h refed after 24 h fasting  $ROR\alpha^{f/f}$  and  $ROR\alpha^{LKO}$  mice were euthanized to collect livers. **(b)** Expression levels of PPAR $\alpha$  target genes in liver from  $ROR\alpha^{f/f}$  and  $ROR\alpha^{LKO}$  mice fasted or refed (n=3/group) as determined by qRT-PCR. Expression was normalized to 36B4 expression. **(c)** ChIP assays were performed on the *Acox1* and *Fgf21* promoters in liver extract from  $ROR\alpha^{f/f}$  and  $ROR\alpha^{LKO}$  mice fasted or refed (n=3/group). Promoter occupancy by PPAR $\alpha$  and GFP was analyzed. **(d)** Expression levels of autophagy-related PPAR $\alpha$  target genes in liver from  $ROR\alpha^{f/f}$  and  $ROR\alpha^{LKO}$  mice fasted or refed (n=3/group) as determined by qRT-PCR. Expression was normalized to 36B4 expression. Data expressed as mean  $\pm$  SEM. Statistical analysis was performed using two-way ANOVA. \*p<0.05, \*\*p<0.01, \*\*\*p<0.001, NS=Non-Significant.

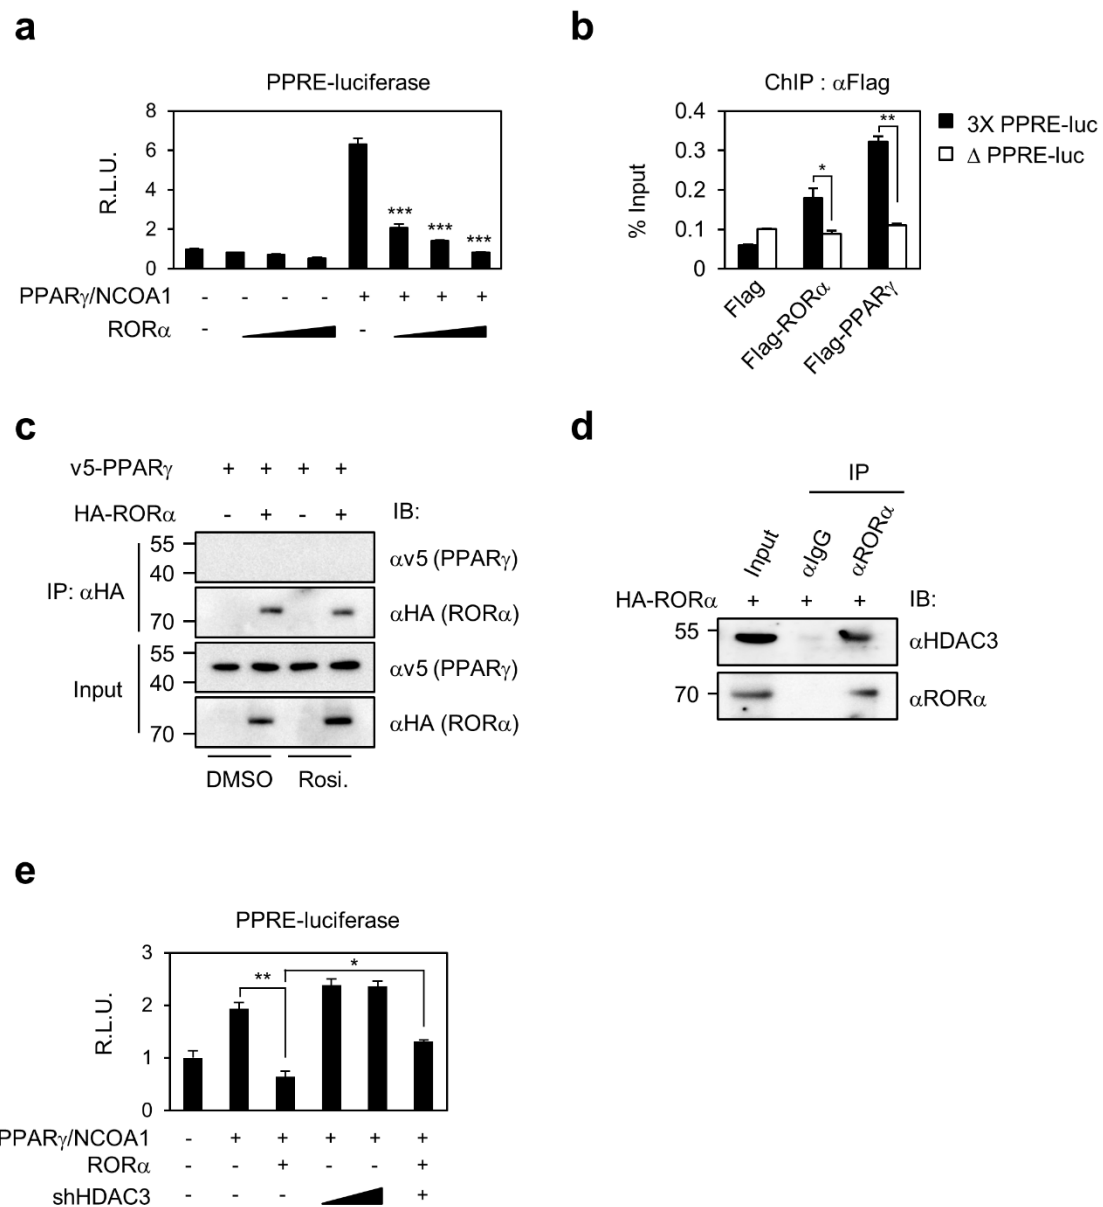

**Supplementary Figure 3. ROR $\alpha$  interacts with HDAC3 to repress PPAR $\gamma$  transcriptional activity with p160 family coactivator.**

(a) Effect of overexpression of ROR $\alpha$  on PPRE-luciferase reporter activity with coactivator NCOA1. Data expressed as mean  $\pm$  SEM. Statistical analysis was performed using one-way ANOVA followed by Tukey's post hoc analysis. \*\*\* $p$ <0.001, compared to PPAR $\gamma$ /PGC1 $\alpha$  group. (b) WT PPRE promoter and PPRE deleted mutant promoter containing luciferase

reporter plasmid and Flag/Flag-ROR $\alpha$ /Flag-PPAR $\gamma$  plasmid were transfected into Hep3B cells. ChIP assays were performed on promoter region of reporter plasmid in Hep3B cells. Promoter occupancy by Flag was analyzed. Data expressed as mean  $\pm$  SEM. Statistical analysis was performed using Student's unpaired t-test. \*p<0.05, \*\*p<0.01. (c) Co-immunoprecipitation assay was performed to detect the interaction between ROR $\alpha$  and PPAR $\gamma$  of HEK293T cells. (d) Co-immunoprecipitation assay was performed to detect the interaction between ROR $\alpha$  and HDAC3 of HEK293T cells. (e) Effect of knockdown of HDAC3 with coactivator NCOA1 on PPRE-luciferase reporter activity. Data expressed as mean  $\pm$  SEM. Statistical analysis was performed using one-way ANOVA followed by Tukey's post hoc analysis. \*p<0.05, \*\*p<0.01.

**a**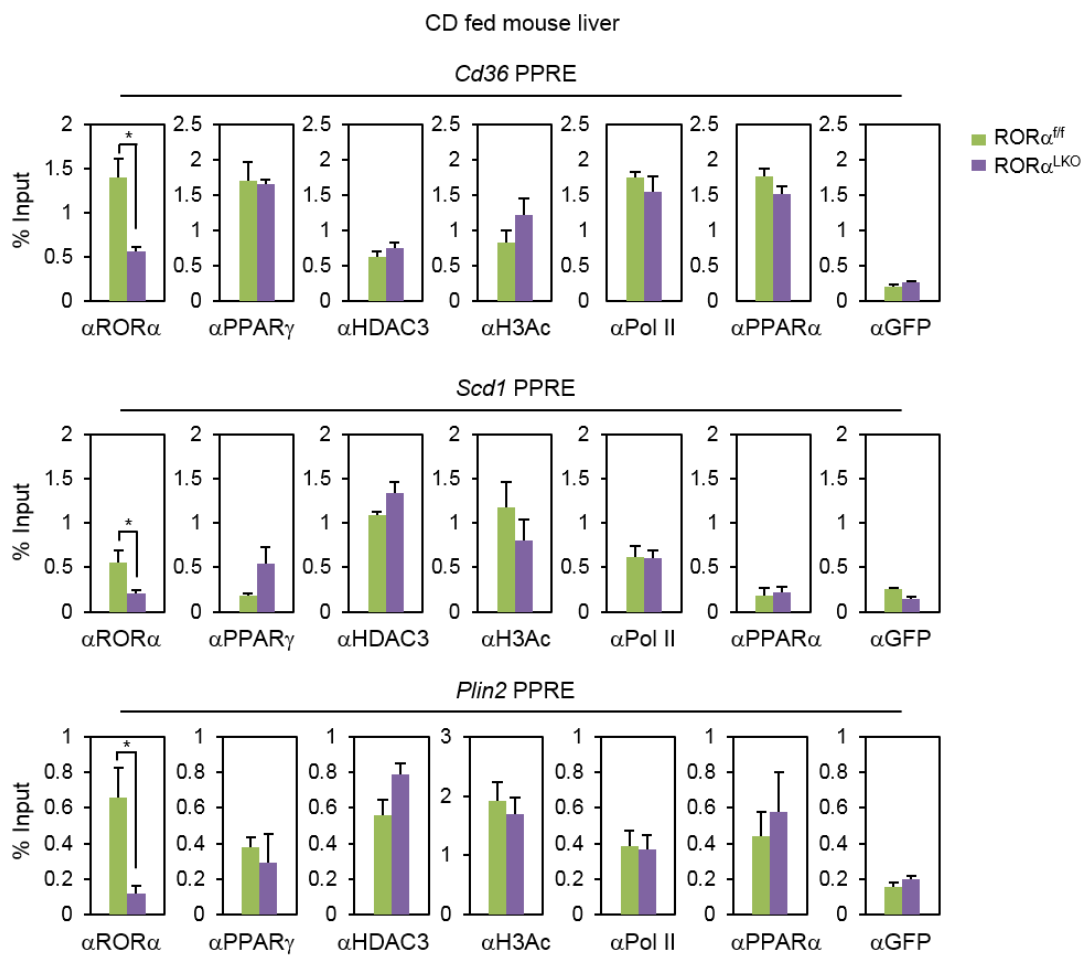**b**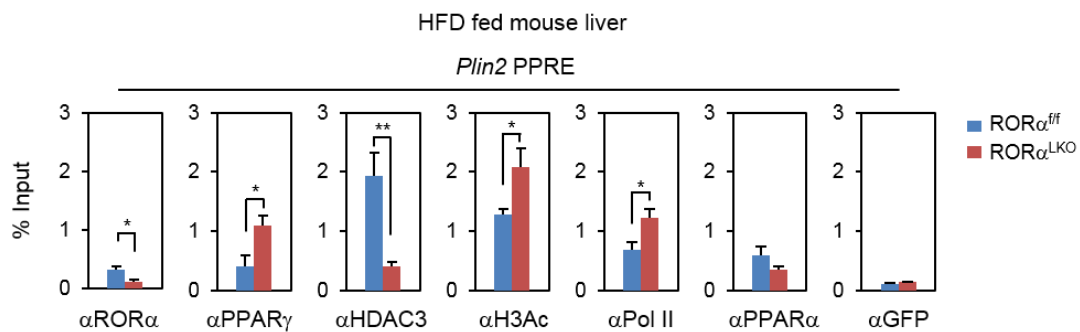**c**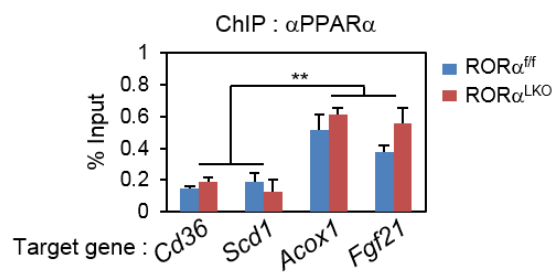



**Supplementary Figure 4. The recruitment of PPAR $\gamma$  to the PPAR $\gamma$  target gene promoters is similar between ROR $\alpha^{f/f}$  and ROR $\alpha^{LKO}$  mice fed CD unlike mice fed HFD.**

(a) ChIP assays were performed on the *Cd36*, *Scd1* and *Plin2* promoters in liver extract from ROR $\alpha^{f/f}$  and ROR $\alpha^{LKO}$  mice fed CD for 10 weeks (n=3/group). Promoter occupancy by ROR $\alpha$ , PPAR $\gamma$ , PGC1 $\alpha$ , HDAC3, H3Ac, Pol II, PPAR $\alpha$  and GFP was analyzed. (b) ChIP assays were performed on the *Plin2* promoters in liver extract from ROR $\alpha^{f/f}$  and ROR $\alpha^{LKO}$  mice fed HFD for 10 weeks (n=3/group). Promoter occupancy by ROR $\alpha$ , PPAR $\gamma$ , PGC1 $\alpha$ , HDAC3, H3Ac, Pol II, PPAR $\alpha$  and GFP was analyzed. Data expressed as mean  $\pm$  SEM. Statistical analysis was performed using Student's unpaired t-test. \*p<0.05, \*\*p<0.01.

(c) ChIP assays were performed on the *Cd36*, *Scd1*, *Acox1* and *Fgf21* promoters in liver extract from ROR $\alpha^{f/f}$  and ROR $\alpha^{LKO}$  mice fed HFD for 10 weeks (n=3/group). Promoter occupancy by PPAR $\alpha$  was analyzed. Data expressed as mean  $\pm$  SEM. Statistical analysis was performed using two-way ANOVA followed by Tukey's post hoc analysis. \*\*p<0.01.

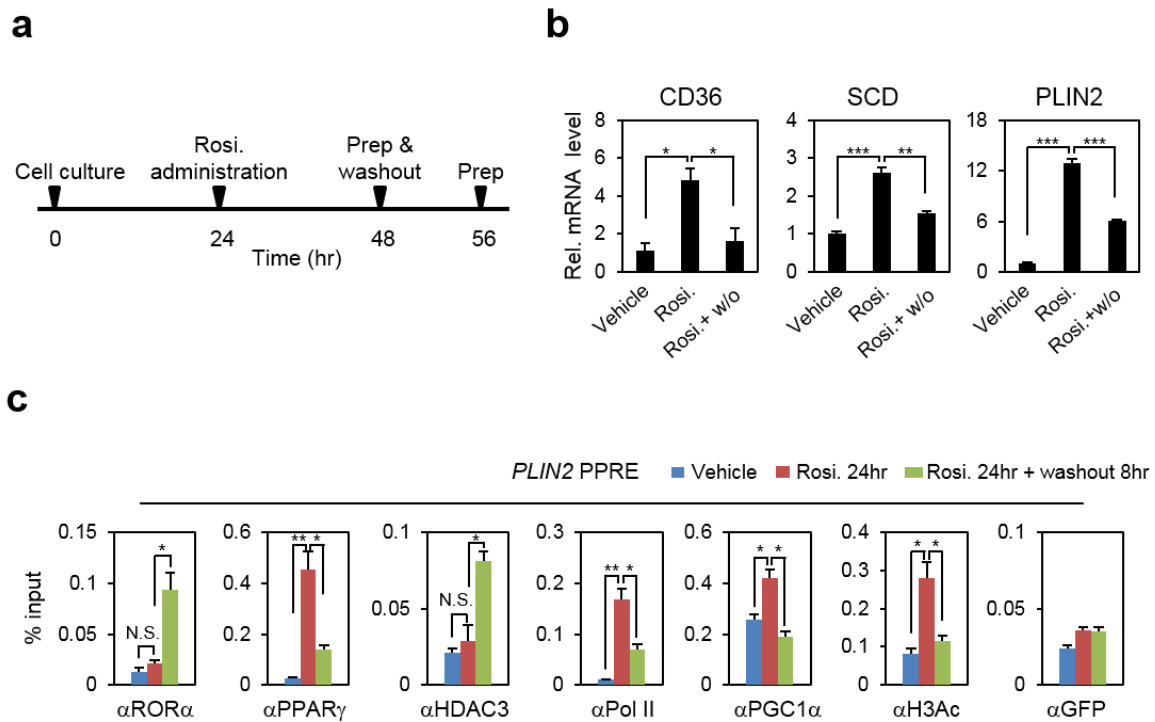

**Supplementary Figure 5. Gene expression profile and ChIP assay in response to Rosi.+washout experimental conditions.**

(a) Schematic representation of experimental design. (b) Expression levels of PPAR $\gamma$  target genes in the absence or presence of ROR $\alpha$  in Hep3B cells with or without Rosiglitazone (20  $\mu$ M) treatment for 24 hr and washout 8 hr as determined by qRT-PCR. Expression was normalized to HPRT expression. Data expressed as mean  $\pm$  SEM. Statistical analysis was performed using one-way ANOVA followed by Tukey's post hoc analysis. \* $p$ <0.05, \*\* $p$ <0.01, \*\*\* $p$ <0.001. (c) ChIP assays were performed on the *PLIN2* promoters in Hep3B cells with or without Rosiglitazone (20  $\mu$ M) treatment for 24 hr and washout 8 hr. Promoter occupancy of ROR $\alpha$ , PPAR $\gamma$ , HDAC3, Pol II, PGC1 $\alpha$ , H3Ac and GFP was analyzed. Data expressed as mean  $\pm$  SEM. Statistical analysis was performed using one-way ANOVA

followed by Tukey's post hoc analysis. \* $p < 0.05$ , \*\* $p < 0.01$ , \*\*\* $p < 0.001$ , NS=Non-Significant.

**a**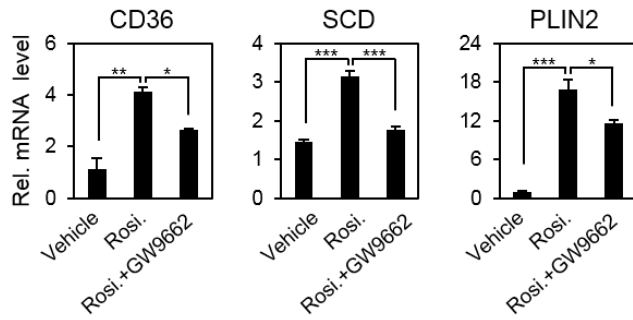**b**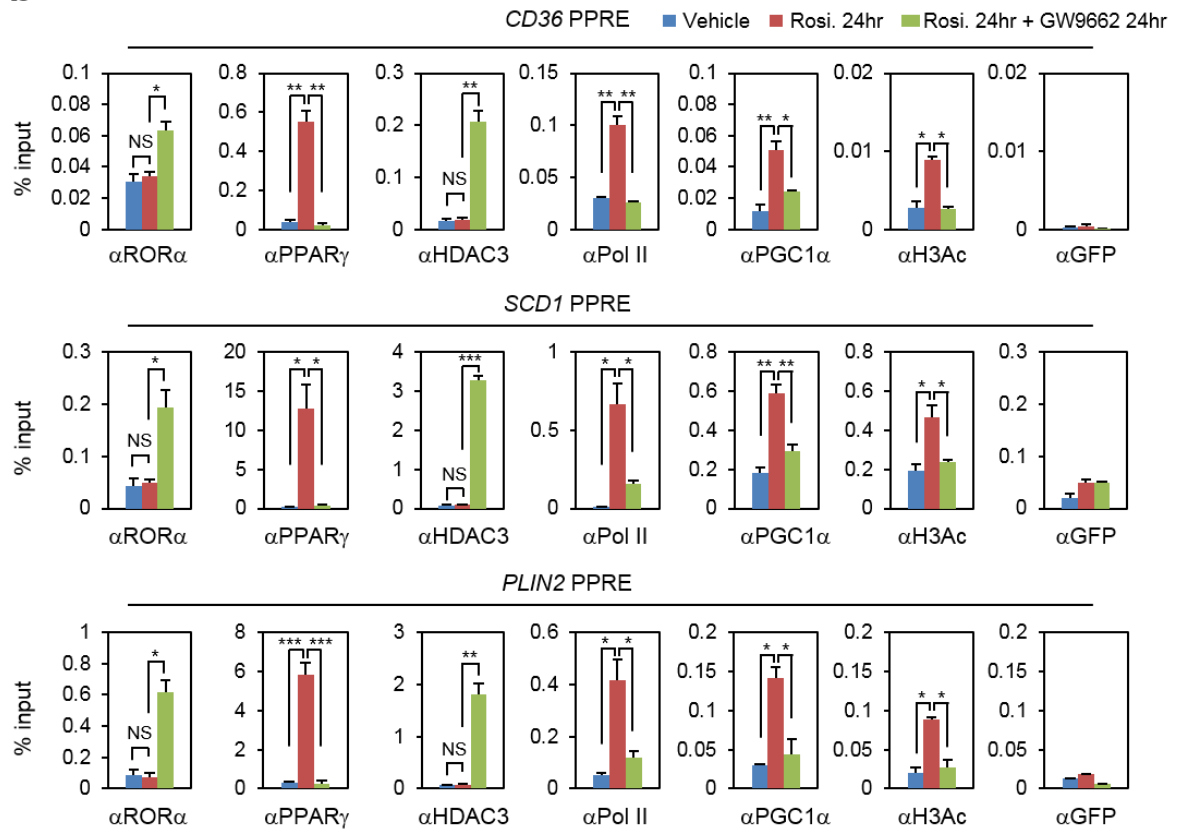

**Supplementary Figure 6. The recruitment of ROR $\alpha$  to PPAR $\gamma$  target genes promoter increases when PPAR $\gamma$  signal is reduced and it is opposite to PPAR $\gamma$  recruitment.**

(a) Expression levels of PPAR $\gamma$  target genes in Hep3B cells with or without Rosiglitazone (20  $\mu$ M) treatment for 24 hr and after treated GW9662 24 hr as determined by qRT-PCR.

Expression was normalized to HPRT expression. Data expressed as mean  $\pm$  SEM. **(b)** ChIP assays were performed on the *CD36*, *SCD* and *PLIN2* promoters in Hep3B cells with or without Rosiglitazone (20  $\mu$ M) treatment for 24 hr and after treated GW9662 24 hr. Promoter occupancy of ROR $\alpha$ , PPAR $\gamma$ , HDAC3, Pol II, PGC1 $\alpha$ , H3Ac and GFP was analyzed. Data expressed as mean  $\pm$  SEM. Data expressed as mean  $\pm$  SEM. Statistical analysis was performed using one-way ANOVA followed by Tukey's post hoc analysis. \* $p$ <0.05, \*\* $p$ <0.01, \*\*\* $p$ <0.001.

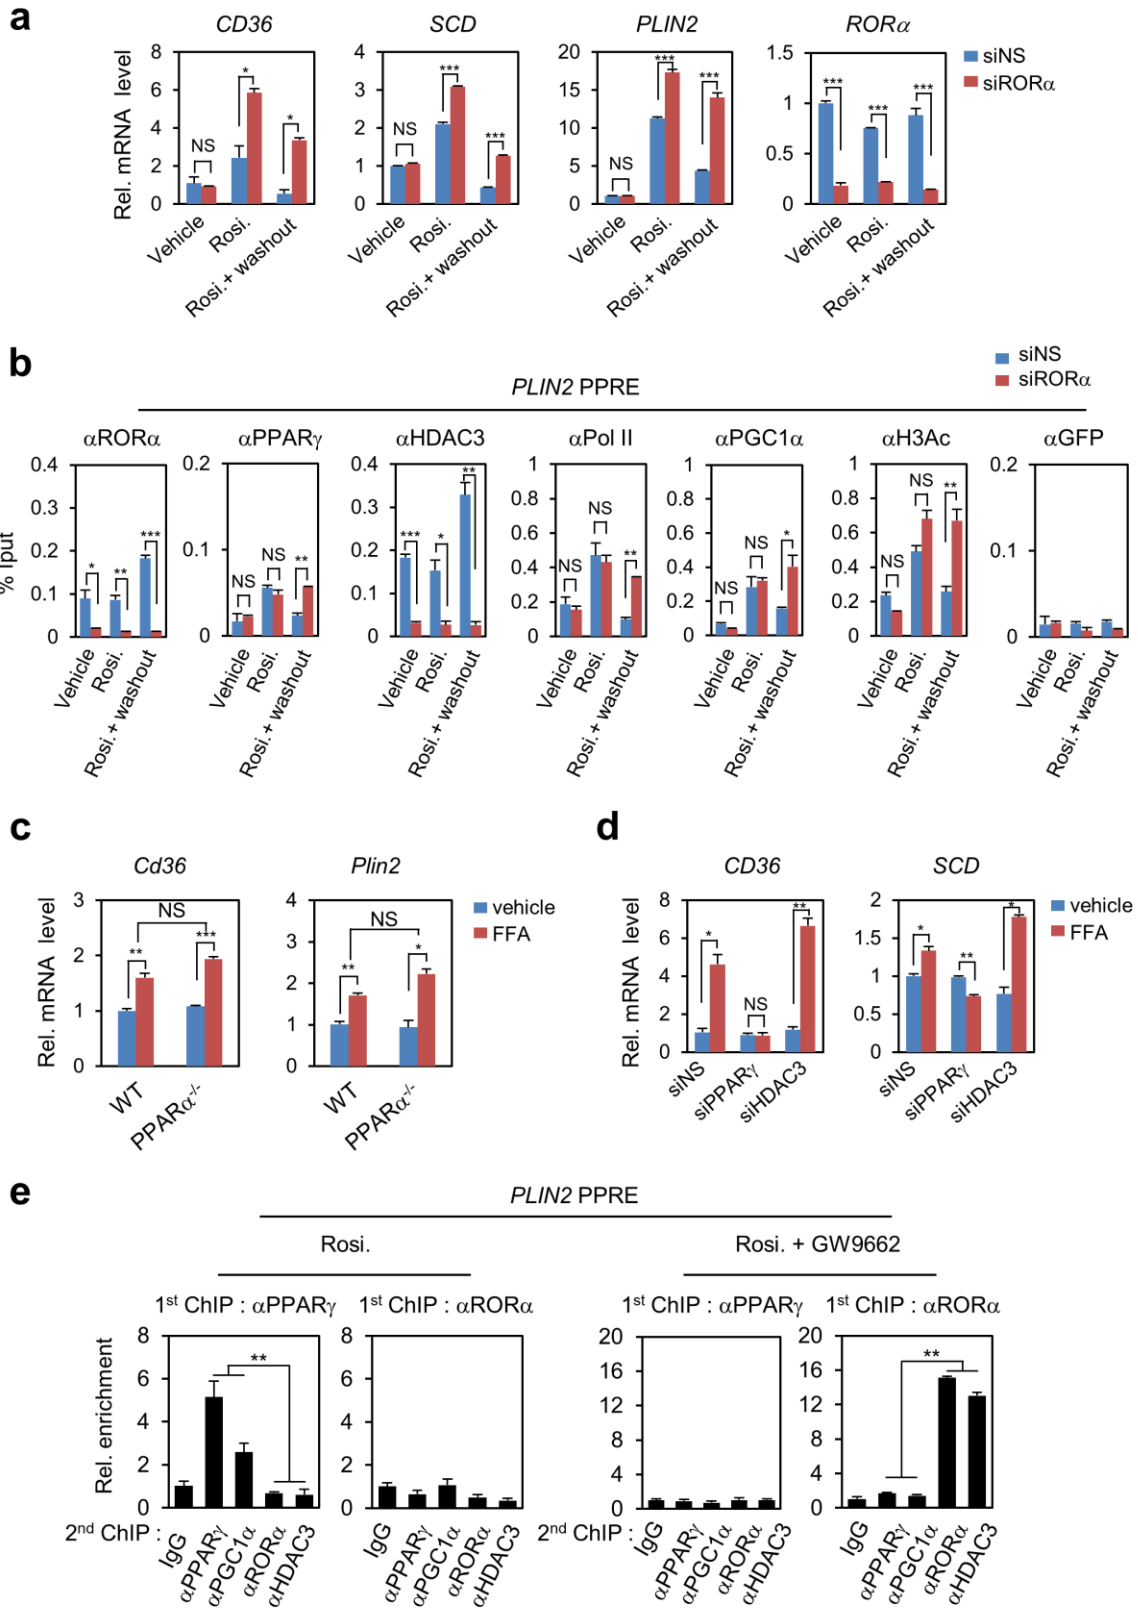

**Supplementary Figure 7. ROR $\alpha$  is required to recruit HDAC3 to PPAR $\gamma$  target genes promoter.**

(a) Expression levels of PPAR $\gamma$  target genes and ROR $\alpha$  in the absence or presence of ROR $\alpha$  in Hep3B cells with or without Rosiglitazone (20  $\mu$ M) treatment for 24 hr and washout 8 hr as determined by qRT-PCR. Expression was normalized to HPRT expression. Data expressed as mean  $\pm$  SEM. Statistical analysis was performed using Student's unpaired t-test. \* $p$ <0.05, \*\* $p$ <0.01, \*\*\* $p$ <0.001, NS=Non-Significant. (b) ChIP assays were performed in the absence or presence of ROR $\alpha$  on *PLIN2* promoters in Hep3B cells with or without Rosiglitazone (20  $\mu$ M) treatment for 24 hr and washout 8 hr. Promoter occupancy of ROR $\alpha$ , PPAR $\gamma$ , HDAC3, Pol II, PGC1 $\alpha$ , H3Ac and GFP was analyzed. Data expressed as mean  $\pm$  SEM. Statistical analysis was performed using Student's unpaired t-test. \* $p$ <0.05, \*\* $p$ <0.01, \*\*\* $p$ <0.001, NS=Non-Significant. (c) Expression levels of PPAR $\gamma$  target genes in primary hepatocyte from WT and PPAR $\alpha$ <sup>-/-</sup> mice with or without free fatty acid (FFA: Oleic acid 200  $\mu$ M and Palmitic acid 100  $\mu$ M) treatment for 36 hr as determined by qRT-PCR. Expression was normalized to 36B4 expression. Data expressed as mean  $\pm$  SEM. Statistical analysis was performed using two-way ANOVA. \* $p$ <0.05, \*\* $p$ <0.01, \*\*\* $p$ <0.001, NS=Non-Significant. (d) Expression levels of PPAR $\gamma$  target genes in the absence or presence of PPAR $\gamma$ /HDAC3 in Hep3B cells with or without fatty acid (FFA: Oleic acid 200  $\mu$ M and Palmitic acid 100  $\mu$ M) treatment for 24 hr as determined by qRT-PCR. Expression was normalized to HPRT expression. Data expressed as mean  $\pm$  SEM. Statistical analysis was performed using Student's unpaired t-test. \* $p$ <0.05, \*\* $p$ <0.01, NS=Non-Significant. (e) Re-ChIP assays were performed in the absence or presence of ROR $\alpha$  on *PLIN2* promoters in Hep3B cells with or without Rosiglitazone (20  $\mu$ M) treatment for 24 hr and after treated GW9662 24 hr to

determine whether ROR $\alpha$  and PPAR $\gamma$  are assembled on the same promoter. Data expressed as mean  $\pm$  SEM. Statistical analysis was performed using one-way ANOVA followed by Tukey's post hoc analysis. \* $p < 0.05$ , \*\* $p < 0.01$ , \*\*\* $p < 0.001$ .



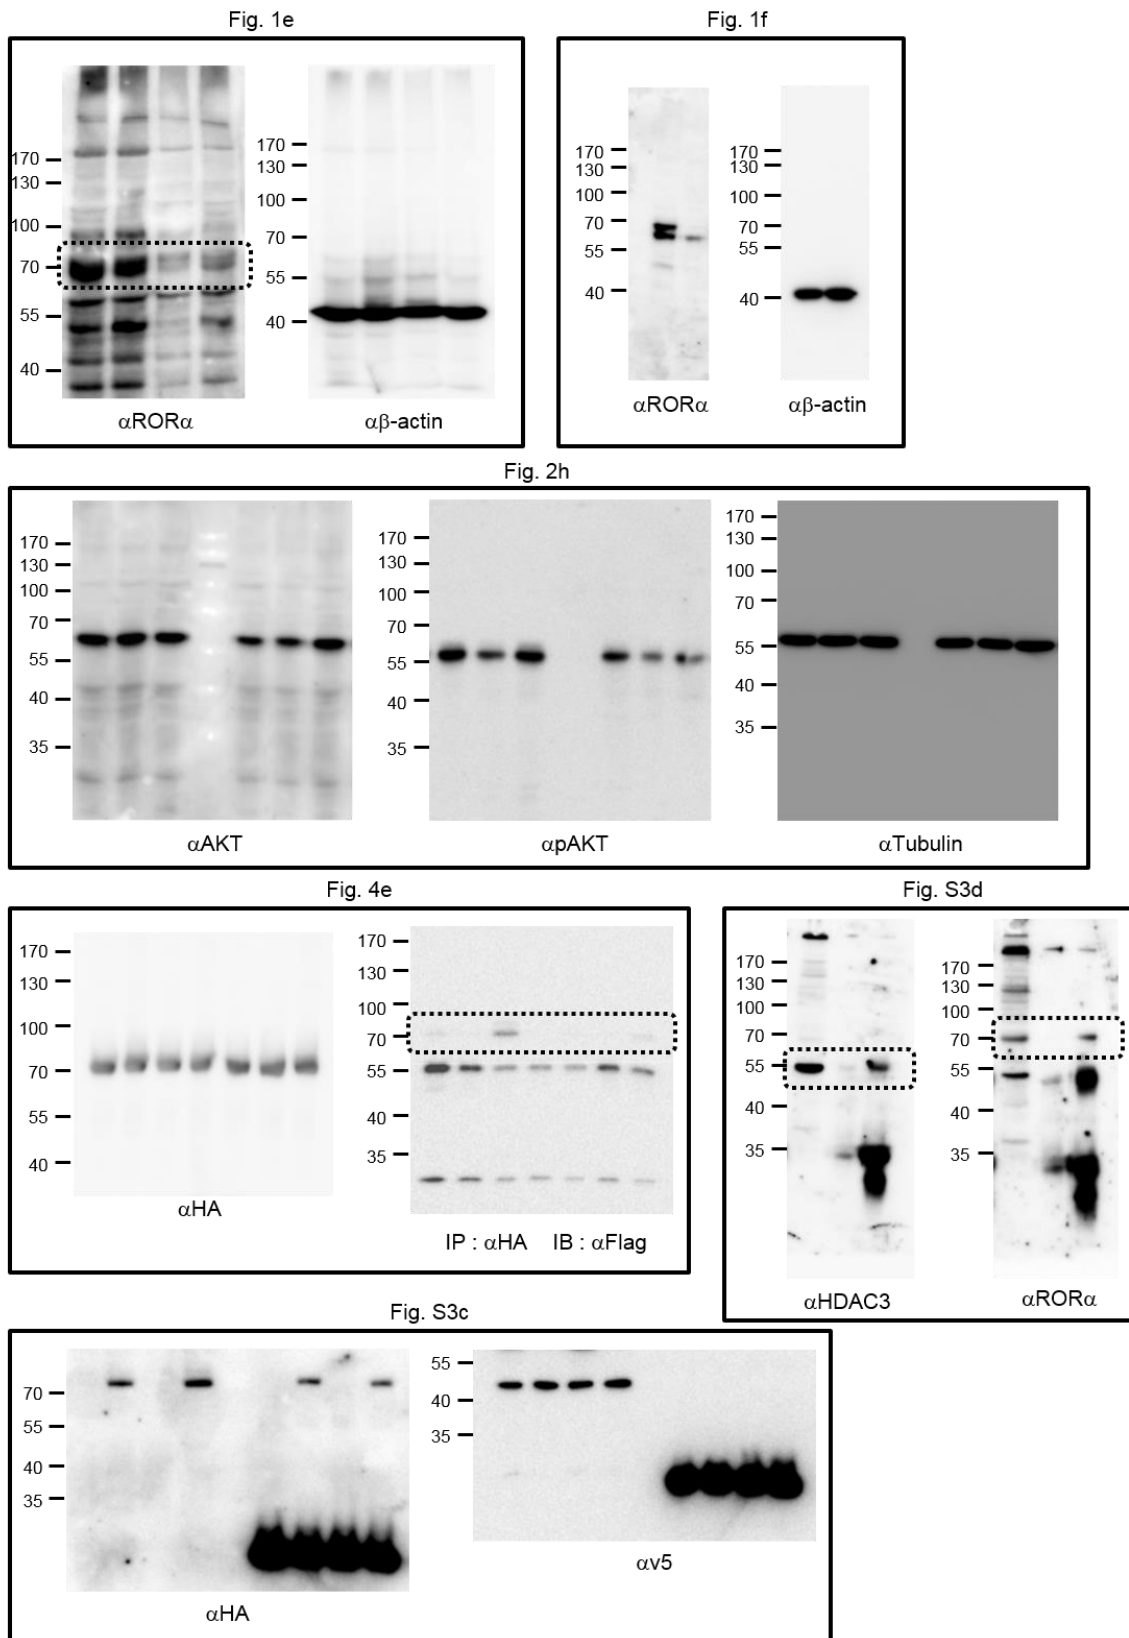

Supplementary Figure 8. Uncropped images for presented immunoblots.
